# Supplementary material for: Predictive nomogram for lymph node metastasis and survival in gastric cancer using contrast-enhanced computed tomography-based radiomics: a retrospective study
Source: PeerJ journal article supplement (doi:10.7717/peerj.17111), 2024-03-20
Supplement: Raw_Data.zip [file Raw_Data.zip]

## Sheet: nomogram
Group 0 Modeling 1 Validation	Radiomic_score	CT_report	N10	Hemoglobin	Diabetes	NRS_2002	Radiomic_evaluation	nomogramscore	Death 1 Survival 0
0	1.09709	0	1	0	0	0	1	0.500219	680	1
0	1.53411	0	1	0	0	0	1	0.500219	648	1
1	1.11981	0	1	1	0	1	1	1.12523	1535	0
1	-1.8021	0	0	0	0	0	0	-1.27317	1525	0
0	0.568088	0	0	0	0	0	0	-1.27317	1517	0
0	-0.0742129	0	1	1	0	0	0	-1.27317	1514	0
1	0.347328	0	0	0	0	2	0	0.65619	300	0
1	1.22644	1	1	1	1	0	1	3.83258	1512	0
1	0.903903	0	0	0	0	0	1	0.500219	1506	0
0	1.48176	1	0	1	0	1	1	2.40285	970	1
0	1.0616	1	1	0	1	2	1	5.76194	52	1
1	0.39532	0	0	1	0	0	0	-1.27317	1486	0
0	1.87199	1	1	0	0	1	1	2.40285	617	1
0	0.988742	0	1	1	1	0	1	2.55497	616	1
1	0.094286	1	0	0	0	0	0	0.004451	1471	0
1	3.24064	1	1	0	0	0	1	1.77784	610	1
0	1.16811	0	1	0	0	2	1	2.42957	725	1
0	0.752033	0	0	0	0	0	1	0.500219	1457	0
0	2.25957	0	1	0	1	2	1	4.48432	109	1
0	-0.211974	1	0	0	0	1	0	0.629463	1443	0
0	1.54501	0	0	1	0	0	1	0.500219	1442	0
0	0.823883	0	1	0	0	1	1	1.12523	1434	0
0	1.63496	1	1	0	1	1	1	4.45759	1429	0
0	2.71852	1	1	0	0	1	1	2.40285	567	1
0	-0.283492	0	0	0	0	1	0	-0.648153	1426	0
0	0.333715	0	1	1	0	1	0	-0.648153	100	1
0	1.60673	1	1	1	1	1	1	4.45759	1291	1
1	1.08876	1	1	0	0	0	1	1.77784	1108	1
0	1.18334	0	0	1	0	0	1	0.500219	1419	0
0	0.942891	0	0	0	0	0	1	0.500219	1416	0
0	2.56949	0	1	0	0	1	1	1.12523	184	1
0	1.4749	0	1	0	0	1	1	1.12523	200	1
0	1.14944	0	1	0	0	0	1	0.500219	1407	0
0	0.423918	0	0	0	0	0	0	-1.27317	1407	0
0	0.830287	1	1	0	0	0	1	1.77784	519	1
0	1.82753	0	0	0	0	0	1	0.500219	1402	0
0	2.06323	1	1	1	0	1	1	2.40285	140	1
1	-0.0641596	0	0	0	0	0	0	-1.27317	1395	0
0	0.109624	0	1	0	0	0	0	-1.27317	1381	0
1	-0.993557	1	0	0	0	0	0	0.004451	1380	0
1	-0.0845766	0	1	0	0	0	0	-1.27317	1373	0
0	0.522802	0	1	0	0	0	0	-1.27317	1372	0
0	1.37622	1	1	0	1	2	1	5.76194	1299	1
0	-0.579208	1	1	0	1	0	0	2.0592	1370	0
0	1.35732	0	1	0	0	0	1	0.500219	688	1
0	1.21024	0	1	0	0	0	1	0.500219	352	1
0	0.753917	1	1	0	0	0	1	1.77784	642	1
0	0.660583	1	1	1	0	0	1	1.77784	822	1
0	0.546067	1	0	0	0	0	0	0.004451	1346	0
0	0.981266	0	0	0	0	1	1	1.12523	484	1
1	-0.438211	0	0	0	0	0	0	-1.27317	1336	0
0	1.34103	0	1	0	0	1	1	1.12523	622	1
1	0.0189665	0	1	0	0	2	0	0.65619	1332	0
1	1.50372	1	1	0	0	2	1	3.70719	131	1
0	1.09482	1	1	1	0	1	1	2.40285	1316	0
0	0.142613	0	0	0	0	0	0	-1.27317	1310	0
0	2.0211	0	1	1	0	0	1	0.500219	1308	0
1	-0.960425	0	0	0	0	0	0	-1.27317	1308	0
1	0.843211	0	1	1	0	0	1	0.500219	867	1
0	1.03705	1	1	1	0	0	1	1.77784	409	1
0	-4.74481	0	0	0	1	0	0	0.781582	1294	0
0	1.68386	0	1	0	1	1	1	3.17998	1286	0
0	0.671919	0	0	0	0	1	1	1.12523	1286	0
0	0.781161	0	0	0	0	0	1	0.500219	1280	0
0	2.97354	0	1	0	0	1	1	1.12523	169	1
1	0.707902	1	1	0	0	0	1	1.77784	1268	0
0	0.142468	0	1	0	0	0	0	-1.27317	1265	0
0	0.392528	1	1	1	0	0	0	0.004451	584	1
0	-1.23413	1	0	0	0	0	0	0.004451	1261	0
0	0.71129	1	1	0	0	1	1	2.40285	1252	0
1	2.26908	1	1	0	0	0	1	1.77784	329	1
1	2.01239	1	1	0	0	0	1	1.77784	385	1
1	-1.16182	0	0	0	1	0	0	0.781582	1239	0
0	0.761888	0	1	0	0	0	1	0.500219	1238	0
1	0.0110857	0	0	1	0	0	0	-1.27317	1238	0
0	1.06927	0	1	0	0	0	1	0.500219	1232	0
1	1.79686	0	1	0	0	0	1	0.500219	1231	0
0	1.45538	1	1	1	1	0	1	3.83258	1225	0
0	-0.692607	0	1	0	1	1	0	1.40659	1212	0
0	0.870185	1	1	1	0	1	1	2.40285	1211	0
1	0.825342	0	1	0	0	0	1	0.500219	1204	0
0	-0.392401	0	0	0	0	1	0	-0.648153	1195	0
0	0.229102	0	1	1	0	0	0	-1.27317	1060	1
0	0.782514	0	1	0	0	0	1	0.500219	1188	0
0	0.549473	1	1	0	0	0	0	0.004451	729	1
1	0.644445	0	0	1	0	0	1	0.500219	1181	0
0	0.637171	0	0	0	0	0	1	0.500219	1175	0
0	-0.207974	0	1	0	0	0	0	-1.27317	1175	0
0	0.261688	0	0	0	0	0	0	-1.27317	809	1
1	0.0844398	1	1	0	0	1	0	0.629463	1169	0
0	0.11258	1	1	1	1	1	0	2.68421	1163	0
1	-0.0118501	0	0	0	0	0	0	-1.27317	1161	0
1	1.4772	0	1	0	0	0	1	0.500219	1149	0
0	-0.434977	1	1	0	0	0	0	0.004451	1147	0
0	2.41159	0	1	0	1	2	1	4.48432	413	1
0	1.31377	1	1	0	1	0	1	3.83258	411	1
0	0.537778	0	0	0	0	0	0	-1.27317	1115	0
0	0.420067	0	0	0	0	1	0	-0.648153	582	1
0	0.994836	1	1	1	0	1	1	2.40285	1091	0
1	2.00921	1	1	0	0	0	1	1.77784	655	1
1	1.85459	1	0	1	0	1	1	2.40285	1086	0
0	0.280024	1	0	0	0	1	0	0.629463	1084	0
0	1.2952	1	1	0	0	0	1	1.77784	520	1
0	-1.67646	0	1	0	0	1	0	-0.648153	1073	0
0	2.1329	0	0	0	0	0	1	0.500219	1071	0
1	0.894821	1	1	0	0	0	1	1.77784	1070	0
0	-3.0442	0	0	0	0	0	0	-1.27317	1069	0
1	0.869656	0	1	0	0	1	1	1.12523	326	1
0	-0.179703	1	0	0	0	0	0	0.004451	1065	0
1	1.67954	0	0	0	0	0	1	0.500219	442	1
0	1.81092	1	1	1	0	1	1	2.40285	1050	0
0	0.903531	0	0	0	0	0	1	0.500219	1044	0
0	1.05674	1	1	0	1	0	1	3.83258	1043	0
1	1.61511	0	1	0	0	1	1	1.12523	1000	0
0	-0.585541	0	1	1	0	2	0	0.65619	992	0
0	0.65258	1	1	1	0	1	1	2.40285	724	1
1	1.17075	1	1	0	0	0	1	1.77784	296	1
1	0.919631	1	1	0	0	1	1	2.40285	362	1
0	2.78405	1	1	0	1	0	1	3.83258	964	0
0	1.94959	0	1	0	0	0	1	0.500219	957	0
1	2.66783	0	1	0	1	2	1	4.48432	578	1
1	2.64568	1	0	0	0	1	1	2.40285	944	0
0	-3.31155	0	0	1	0	1	0	-0.648153	926	0
1	1.52138	1	0	0	1	1	1	4.45759	922	0
1	-0.460507	0	1	0	0	0	0	-1.27317	915	0
0	1.29481	1	0	0	0	0	1	1.77784	910	0
1	-0.190013	1	1	0	0	1	0	0.629463	560	0
0	-0.136297	1	1	0	0	0	0	0.004451	108	1
1	0.0954061	0	0	0	0	0	0	-1.27317	490	1
0	2.29356	0	1	0	0	1	1	1.12523	639	1
1	0.827152	0	1	0	0	0	1	0.500219	849	1
0	-0.4241	0	0	0	0	0	0	-1.27317	884	0
0	-0.710682	0	0	0	0	1	0	-0.648153	883	0
1	-0.68971	1	1	1	0	1	0	0.629463	882	0
0	-0.238245	1	0	0	0	0	0	0.004451	855	0
0	2.0733	0	0	0	0	0	1	0.500219	855	0
1	0.638529	1	1	1	0	2	1	3.70719	318	1
0	0.428865	0	0	0	0	1	0	-0.648153	841	0
0	-0.632395	0	0	0	0	0	0	-1.27317	838	0
1	0.770479	1	1	0	0	0	1	1.77784	834	0
0	0.391509	0	1	0	0	1	0	-0.648153	827	0
0	0.851448	0	1	0	0	0	1	0.500219	826	0
0	0.601083	1	1	1	0	0	1	1.77784	826	0
0	0.868617	1	1	1	0	1	1	2.40285	324	1
0	0.192806	0	0	0	0	0	0	-1.27317	819	0
0	0.0868027	0	0	0	0	0	0	-1.27317	817	0
1	0.790261	1	1	0	0	1	1	2.40285	374	1
1	0.771352	0	0	0	0	0	1	0.500219	811	0
1	0.397622	1	1	0	0	1	0	0.629463	335	1
0	-0.758834	0	0	0	0	0	0	-1.27317	799	0
0	0.267376	0	1	0	0	1	0	-0.648153	791	0
1	-0.298302	1	1	0	0	0	0	0.004451	562	1
0	1.11405	0	1	0	0	2	1	2.42957	786	0
1	0.557867	0	1	0	0	0	0	-1.27317	785	0
0	1.20979	1	1	1	0	1	1	2.40285	225	1
0	-0.316418	1	1	1	0	2	0	1.93381	784	0
0	-2.95378	0	0	0	0	1	0	-0.648153	783	0
1	0.898574	0	1	0	0	2	1	2.42957	782	0
0	-4.06246	0	0	0	0	0	0	-1.27317	775	0
0	1.30673	0	1	0	0	1	1	1.12523	771	0
0	0.738123	1	1	0	0	0	1	1.77784	85	1
0	2.16759	1	1	1	0	1	1	2.40285	383	1
1	0.403852	1	1	1	0	0	0	0.004451	623	0
0	0.867864	0	1	0	0	0	1	0.500219	241	1
0	-0.296592	1	0	0	0	0	0	0.004451	752	0
1	0.779649	1	1	0	0	0	1	1.77784	751	0
1	0.395158	0	1	0	0	1	0	-0.648153	747	0
1	0.511077	1	1	0	0	0	0	0.004451	689	1
0	-1.2812	0	0	0	0	0	0	-1.27317	742	0
0	-2.08568	0	0	0	0	0	0	-1.27317	741	0
0	-0.0936461	1	1	0	0	0	0	0.004451	390	1
0	0.967543	1	1	1	0	0	1	1.77784	731	0
0	-0.422182	0	0	0	0	0	0	-1.27317	722	0
0	-1.88316	0	0	1	0	2	0	0.65619	722	0
1	0.403357	1	0	0	0	0	0	0.004451	720	0
1	3.31668	1	1	0	0	1	1	2.40285	420	1
0	1.73246	1	1	1	0	1	1	2.40285	334	1
0	1.04876	1	1	0	0	0	1	1.77784	188	1
1	0.115485	1	1	0	0	0	0	0.004451	714	0
1	-0.808341	1	0	0	1	0	0	2.0592	714	0
0	0.320485	1	1	0	1	1	0	2.68421	370	1
1	-1.24482	0	0	0	0	0	0	-1.27317	706	0
0	-0.0851695	0	0	0	0	0	0	-1.27317	701	0
0	0.595532	0	1	1	0	1	1	1.12523	417	1
1	1.31407	0	1	0	0	0	1	0.500219	698	0
1	1.17462	1	1	0	0	0	1	1.77784	694	0
0	1.92008	1	1	0	0	1	1	2.40285	694	0
0	0.215623	0	1	0	0	0	0	-1.27317	686	0
1	1.71492	1	1	1	0	1	1	2.40285	685	0
0	1.78186	1	1	0	0	0	1	1.77784	685	0
0	0.0997757	0	0	0	0	0	0	-1.27317	677	0
0	-0.425423	0	0	0	0	0	0	-1.27317	670	0

## Sheet: validation group
Group 0 Modeling 1 Validation	Radiomic_score	CT_report	N10	Hemoglobin	Diabetes	NRS_2002	Radiomic_evaluation	nomogramscore	survival time	Death 1 Survival 0
1	1.11981	0	1	1	0	1	1	1.12523	1535	0
1	-1.8021	0	0	0	0	0	0	-1.27317	1525	0
1	0.347328	0	0	0	0	2	0	0.65619	300	0
1	1.22644	1	1	1	1	0	1	3.83258	1512	0
1	0.903903	0	0	0	0	0	1	0.500219	1506	0
1	0.39532	0	0	1	0	0	0	-1.27317	1486	0
1	0.094286	1	0	0	0	0	0	0.004451	1471	0
1	3.24064	1	1	0	0	0	1	1.77784	610	1
1	1.08876	1	1	0	0	0	1	1.77784	1108	1
1	-0.0641596	0	0	0	0	0	0	-1.27317	1395	0
1	-0.993557	1	0	0	0	0	0	0.004451	1380	0
1	-0.0845766	0	1	0	0	0	0	-1.27317	1373	0
1	-0.438211	0	0	0	0	0	0	-1.27317	1336	0
1	0.0189665	0	1	0	0	2	0	0.65619	1332	0
1	1.50372	1	1	0	0	2	1	3.70719	131	1
1	-0.960425	0	0	0	0	0	0	-1.27317	1308	0
1	0.843211	0	1	1	0	0	1	0.500219	867	1
1	0.707902	1	1	0	0	0	1	1.77784	1268	0
1	2.26908	1	1	0	0	0	1	1.77784	329	1
1	2.01239	1	1	0	0	0	1	1.77784	385	1
1	-1.16182	0	0	0	1	0	0	0.781582	1239	0
1	0.0110857	0	0	1	0	0	0	-1.27317	1238	0
1	1.79686	0	1	0	0	0	1	0.500219	1231	0
1	0.825342	0	1	0	0	0	1	0.500219	1204	0
1	0.644445	0	0	1	0	0	1	0.500219	1181	0
1	0.0844398	1	1	0	0	1	0	0.629463	1169	0
1	-0.0118501	0	0	0	0	0	0	-1.27317	1161	0
1	1.4772	0	1	0	0	0	1	0.500219	1149	0
1	2.00921	1	1	0	0	0	1	1.77784	655	1
1	1.85459	1	0	1	0	1	1	2.40285	1086	0
1	0.894821	1	1	0	0	0	1	1.77784	1070	0
1	0.869656	0	1	0	0	1	1	1.12523	326	1
1	1.67954	0	0	0	0	0	1	0.500219	442	1
1	1.61511	0	1	0	0	1	1	1.12523	1000	0
1	1.17075	1	1	0	0	0	1	1.77784	296	1
1	0.919631	1	1	0	0	1	1	2.40285	362	1
1	2.66783	0	1	0	1	2	1	4.48432	578	1
1	2.64568	1	0	0	0	1	1	2.40285	944	0
1	1.52138	1	0	0	1	1	1	4.45759	922	0
1	-0.460507	0	1	0	0	0	0	-1.27317	915	0
1	-0.190013	1	1	0	0	1	0	0.629463	560	0
1	0.0954061	0	0	0	0	0	0	-1.27317	490	1
1	0.827152	0	1	0	0	0	1	0.500219	849	1
1	-0.68971	1	1	1	0	1	0	0.629463	882	0
1	0.638529	1	1	1	0	2	1	3.70719	318	1
1	0.770479	1	1	0	0	0	1	1.77784	834	0
1	0.790261	1	1	0	0	1	1	2.40285	374	1
1	0.771352	0	0	0	0	0	1	0.500219	811	0
1	0.397622	1	1	0	0	1	0	0.629463	335	1
1	-0.298302	1	1	0	0	0	0	0.004451	562	1
1	0.557867	0	1	0	0	0	0	-1.27317	785	0
1	0.898574	0	1	0	0	2	1	2.42957	782	0
1	0.403852	1	1	1	0	0	0	0.004451	623	0
1	0.779649	1	1	0	0	0	1	1.77784	751	0
1	0.395158	0	1	0	0	1	0	-0.648153	747	0
1	0.511077	1	1	0	0	0	0	0.004451	689	1
1	0.403357	1	0	0	0	0	0	0.004451	720	0
1	3.31668	1	1	0	0	1	1	2.40285	420	1
1	0.115485	1	1	0	0	0	0	0.004451	714	0
1	-0.808341	1	0	0	1	0	0	2.0592	714	0
1	-1.24482	0	0	0	0	0	0	-1.27317	706	0
1	1.31407	0	1	0	0	0	1	0.500219	698	0
1	1.17462	1	1	0	0	0	1	1.77784	694	0
1	1.71492	1	1	1	0	1	1	2.40285	685	0

## Sheet: training group
Group 0 Modeling 1 Validation	Radiomic_score	CT_report	N10	Hemoglobin	Diabetes	NRS_2002	Radiomic_evaluation	nomogramscore	survival time	Death 1 Survival 0
0	1.09709	0	1	0	0	0	1	0.500219	680	1
0	1.53411	0	1	0	0	0	1	0.500219	648	1
0	0.568088	0	0	0	0	0	0	-1.27317	1517	0
0	-0.0742129	0	1	1	0	0	0	-1.27317	1514	0
0	1.48176	1	0	1	0	1	1	2.40285	970	1
0	1.0616	1	1	0	1	2	1	5.76194	52	1
0	1.87199	1	1	0	0	1	1	2.40285	617	1
0	0.988742	0	1	1	1	0	1	2.55497	616	1
0	1.16811	0	1	0	0	2	1	2.42957	725	1
0	0.752033	0	0	0	0	0	1	0.500219	1457	0
0	2.25957	0	1	0	1	2	1	4.48432	109	1
0	-0.211974	1	0	0	0	1	0	0.629463	1443	0
0	1.54501	0	0	1	0	0	1	0.500219	1442	0
0	0.823883	0	1	0	0	1	1	1.12523	1434	0
0	1.63496	1	1	0	1	1	1	4.45759	1429	0
0	2.71852	1	1	0	0	1	1	2.40285	567	1
0	-0.283492	0	0	0	0	1	0	-0.648153	1426	0
0	0.333715	0	1	1	0	1	0	-0.648153	100	1
0	1.60673	1	1	1	1	1	1	4.45759	1291	1
0	1.18334	0	0	1	0	0	1	0.500219	1419	0
0	0.942891	0	0	0	0	0	1	0.500219	1416	0
0	2.56949	0	1	0	0	1	1	1.12523	184	1
0	1.4749	0	1	0	0	1	1	1.12523	200	1
0	1.14944	0	1	0	0	0	1	0.500219	1407	0
0	0.423918	0	0	0	0	0	0	-1.27317	1407	0
0	0.830287	1	1	0	0	0	1	1.77784	519	1
0	1.82753	0	0	0	0	0	1	0.500219	1402	0
0	2.06323	1	1	1	0	1	1	2.40285	140	1
0	0.109624	0	1	0	0	0	0	-1.27317	1381	0
0	0.522802	0	1	0	0	0	0	-1.27317	1372	0
0	1.37622	1	1	0	1	2	1	5.76194	1299	1
0	-0.579208	1	1	0	1	0	0	2.0592	1370	0
0	1.35732	0	1	0	0	0	1	0.500219	688	1
0	1.21024	0	1	0	0	0	1	0.500219	352	1
0	0.753917	1	1	0	0	0	1	1.77784	642	1
0	0.660583	1	1	1	0	0	1	1.77784	822	1
0	0.546067	1	0	0	0	0	0	0.004451	1346	0
0	0.981266	0	0	0	0	1	1	1.12523	484	1
0	1.34103	0	1	0	0	1	1	1.12523	622	1
0	1.09482	1	1	1	0	1	1	2.40285	1316	0
0	0.142613	0	0	0	0	0	0	-1.27317	1310	0
0	2.0211	0	1	1	0	0	1	0.500219	1308	0
0	1.03705	1	1	1	0	0	1	1.77784	409	1
0	-4.74481	0	0	0	1	0	0	0.781582	1294	0
0	1.68386	0	1	0	1	1	1	3.17998	1286	0
0	0.671919	0	0	0	0	1	1	1.12523	1286	0
0	0.781161	0	0	0	0	0	1	0.500219	1280	0
0	2.97354	0	1	0	0	1	1	1.12523	169	1
0	0.142468	0	1	0	0	0	0	-1.27317	1265	0
0	0.392528	1	1	1	0	0	0	0.004451	584	1
0	-1.23413	1	0	0	0	0	0	0.004451	1261	0
0	0.71129	1	1	0	0	1	1	2.40285	1252	0
0	0.761888	0	1	0	0	0	1	0.500219	1238	0
0	1.06927	0	1	0	0	0	1	0.500219	1232	0
0	1.45538	1	1	1	1	0	1	3.83258	1225	0
0	-0.692607	0	1	0	1	1	0	1.40659	1212	0
0	0.870185	1	1	1	0	1	1	2.40285	1211	0
0	-0.392401	0	0	0	0	1	0	-0.648153	1195	0
0	0.229102	0	1	1	0	0	0	-1.27317	1060	1
0	0.782514	0	1	0	0	0	1	0.500219	1188	0
0	0.549473	1	1	0	0	0	0	0.004451	729	1
0	0.637171	0	0	0	0	0	1	0.500219	1175	0
0	-0.207974	0	1	0	0	0	0	-1.27317	1175	0
0	0.261688	0	0	0	0	0	0	-1.27317	809	1
0	0.11258	1	1	1	1	1	0	2.68421	1163	0
0	-0.434977	1	1	0	0	0	0	0.004451	1147	0
0	2.41159	0	1	0	1	2	1	4.48432	413	1
0	1.31377	1	1	0	1	0	1	3.83258	411	1
0	0.537778	0	0	0	0	0	0	-1.27317	1115	0
0	0.420067	0	0	0	0	1	0	-0.648153	582	1
0	0.994836	1	1	1	0	1	1	2.40285	1091	0
0	0.280024	1	0	0	0	1	0	0.629463	1084	0
0	1.2952	1	1	0	0	0	1	1.77784	520	1
0	-1.67646	0	1	0	0	1	0	-0.648153	1073	0
0	2.1329	0	0	0	0	0	1	0.500219	1071	0
0	-3.0442	0	0	0	0	0	0	-1.27317	1069	0
0	-0.179703	1	0	0	0	0	0	0.004451	1065	0
0	1.81092	1	1	1	0	1	1	2.40285	1050	0
0	0.903531	0	0	0	0	0	1	0.500219	1044	0
0	1.05674	1	1	0	1	0	1	3.83258	1043	0
0	-0.585541	0	1	1	0	2	0	0.65619	992	0
0	0.65258	1	1	1	0	1	1	2.40285	724	1
0	2.78405	1	1	0	1	0	1	3.83258	964	0
0	1.94959	0	1	0	0	0	1	0.500219	957	0
0	-3.31155	0	0	1	0	1	0	-0.648153	926	0
0	1.29481	1	0	0	0	0	1	1.77784	910	0
0	-0.136297	1	1	0	0	0	0	0.004451	108	1
0	2.29356	0	1	0	0	1	1	1.12523	639	1
0	-0.4241	0	0	0	0	0	0	-1.27317	884	0
0	-0.710682	0	0	0	0	1	0	-0.648153	883	0
0	-0.238245	1	0	0	0	0	0	0.004451	855	0
0	2.0733	0	0	0	0	0	1	0.500219	855	0
0	0.428865	0	0	0	0	1	0	-0.648153	841	0
0	-0.632395	0	0	0	0	0	0	-1.27317	838	0
0	0.391509	0	1	0	0	1	0	-0.648153	827	0
0	0.851448	0	1	0	0	0	1	0.500219	826	0
0	0.601083	1	1	1	0	0	1	1.77784	826	0
0	0.868617	1	1	1	0	1	1	2.40285	324	1
0	0.192806	0	0	0	0	0	0	-1.27317	819	0
0	0.0868027	0	0	0	0	0	0	-1.27317	817	0
0	-0.758834	0	0	0	0	0	0	-1.27317	799	0
0	0.267376	0	1	0	0	1	0	-0.648153	791	0
0	1.11405	0	1	0	0	2	1	2.42957	786	0
0	1.20979	1	1	1	0	1	1	2.40285	225	1
0	-0.316418	1	1	1	0	2	0	1.93381	784	0
0	-2.95378	0	0	0	0	1	0	-0.648153	783	0
0	-4.06246	0	0	0	0	0	0	-1.27317	775	0
0	1.30673	0	1	0	0	1	1	1.12523	771	0
0	0.738123	1	1	0	0	0	1	1.77784	85	1
0	2.16759	1	1	1	0	1	1	2.40285	383	1
0	0.867864	0	1	0	0	0	1	0.500219	241	1
0	-0.296592	1	0	0	0	0	0	0.004451	752	0
0	-1.2812	0	0	0	0	0	0	-1.27317	742	0
0	-2.08568	0	0	0	0	0	0	-1.27317	741	0
0	-0.0936461	1	1	0	0	0	0	0.004451	390	1
0	0.967543	1	1	1	0	0	1	1.77784	731	0
0	-0.422182	0	0	0	0	0	0	-1.27317	722	0
0	-1.88316	0	0	1	0	2	0	0.65619	722	0
0	1.73246	1	1	1	0	1	1	2.40285	334	1
0	1.04876	1	1	0	0	0	1	1.77784	188	1
0	0.320485	1	1	0	1	1	0	2.68421	370	1
0	-0.0851695	0	0	0	0	0	0	-1.27317	701	0
0	0.595532	0	1	1	0	1	1	1.12523	417	1
0	1.92008	1	1	0	0	1	1	2.40285	694	0
0	0.215623	0	1	0	0	0	0	-1.27317	686	0
0	1.78186	1	1	0	0	0	1	1.77784	685	0
0	0.0997757	0	0	0	0	0	0	-1.27317	677	0
0	-0.425423	0	0	0	0	0	0	-1.27317	670	0
